# Supplementary material for: Antibacterial properties and cytocompatibility of bio-based nanostructured carbon aerogels derived from silver nanoparticles deposited onto bacterial cellulose
Source: Royal Society of Chemistry journal article supplement (doi:10.1039/c5ra15485e), 2015-01-01
Supplement: c5ra15485e1.pdf [file c5ra15485e1.pdf]

1

## Supplement Data

### 2 **Antibacterial Properties And Cytocompatibility of Bio-based** 3 **Nanostructure Carbon Aerogels Derived From Silver** 4 **Nanoparticles Deposited Bacterial Cellulose**

5 Ning Yan<sup>§</sup>, Yabin Zhou<sup>§</sup>, Yudong Zheng<sup>\*</sup>, Shuang Qiao, Qun Yu, Zhongzheng Li,

6 Haiyang Lu

7 **\*Corresponding Author:** Yudong Zheng, School of Materials Science and Engineering,

8 University of Science and Technology Beijing, Beijing 100083, PR China; Tel: +86 10 62330802,

9 E-mail: [zhengyudong@mater.ustb.edu.cn](mailto:zhengyudong@mater.ustb.edu.cn).

10 *§ Authors contributed equally to this work.*

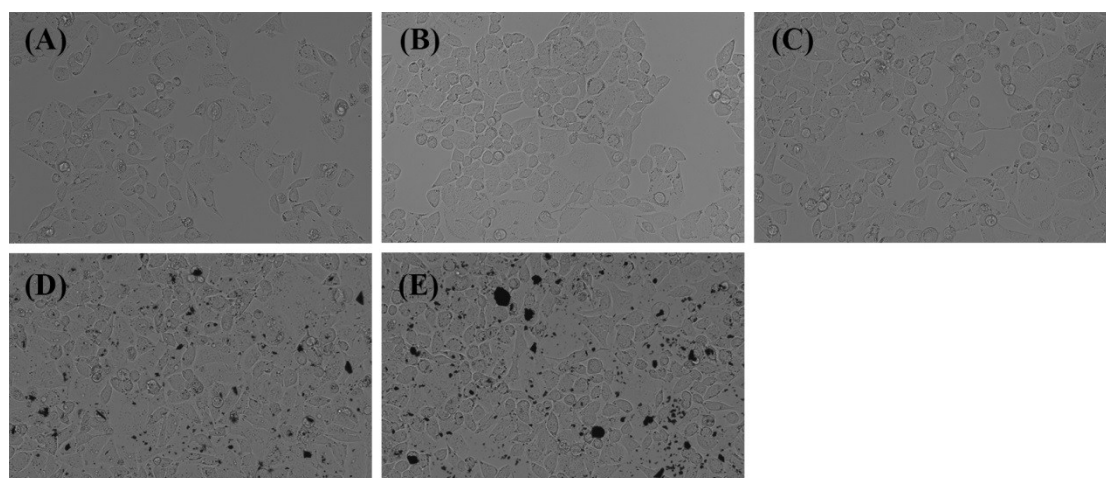

11

12 **Fig. S1** Morphology of Bel-7402 cells cultured in DMEM medium after 24 h by Optical

13 microscope (OM). Control (A), BC (B), BC/AgNP (C), p-BC (D) and p-BC/AgNP (E).

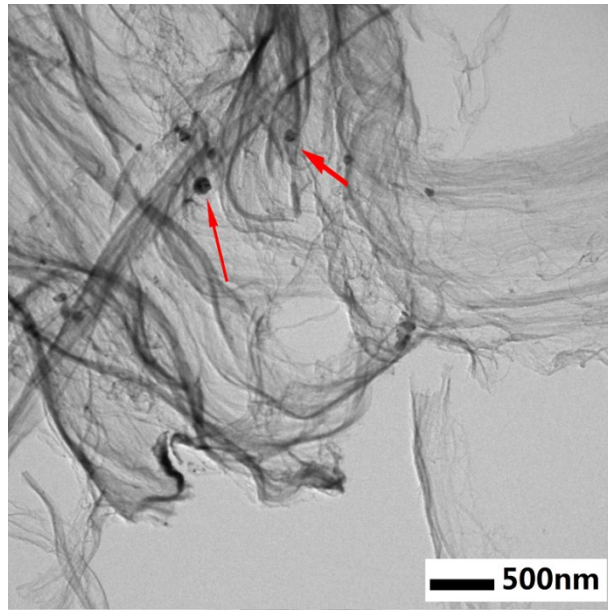

14

15 **Fig. S2** the TEM image of silver nanoparticles in p-BC/AgNP

16
